# Supplementary material
Source: publisher site journal article supplement (https://www.dovepress.com/article/561781)
Supplement: Supplementary file 1 [file 561781%20Revised%20Supplementary%20Table%201.docx]

**Supplementary Table 1: The main theme,  Subtopics and representative quotations in the interview**

| **Theme** | **Subtopics** | **Representative Statements from Interviews** |
| --- | --- | --- |
| 1. Theme One: Support System Dilemma | 1.1 The predicament of social support | H1: "There aren't many people in the village anymore. Apart from staying at home, I just take a stroll around the door every day."  H5: "I'm getting older, I don't talk much, I can't play poker or chess, I just stay at home and do things (with a wry smile)." |
| 1.2 The home life support system is not perfect | H6: "I can't go out in winter. I'm afraid I might lose my balance and slip......I have to be careful to walk."  H7: "My knees are not in good condition. It's hard for me to go up and down stairs or cook."  H12: "When bending over to wash rice or cut vegetables, my back can't straighten up, arthritis follows suit, and my hands feel weak." |
| 1.3 Insufficient psychological support | H3: "My spouse passed away this year. Every night, I'm still thinking about things to some extent. I've been hospitalized three times this year and can't sleep well every day....... I still have no appetite for food (worried and nervous)."  H4: "After being discharged from the hospital, I'm afraid I won't be able to take good care of myself and I'm afraid I'll be hospitalized again." |
| 1.4 Lack of health emergency support system | H7: "I also want to know who to turn to for help when I feel unwell at home. I can't just rush to the hospital for a minor matter."  H9: "Hospital nurses can help measure blood pressure and blood sugar. But if our blood pressure suddenly rises when we get home, we don't know what to do first." |
| 1. Theme Two: Guidance Needs for Discharge Information | 2.1 Guidance requirements for electronic monitoring instruments | H3: "I'm not sure if the electronic blood pressure monitor at home measures correctly. When I was in the hospital, it was always the nurses who took the measurements. It seems a bit different from when I did it at home. When the nurses were taking the measurements, their hands were both touching and stuffed (helpless)."  H7: "Could you teach my family how to measure my blood pressure and blood sugar? We have all kinds of devices at home. My eyesight is too blurry. If they learn, I'll feel more at ease." |
| 2.2 Dietary guidance needs for multiple diseases | H9: "People with diabetes can't eat sweet food, those with hypertension need to consume less salt, and it seems that Parkinson's disease requires some high-protein food? With all these ingredients together, I don't even know what to ask my wife to cook." |
| 2.3 Demand for sports exercise guidance | H9: "The doctor said I need to practice walking at home, but I'm always afraid of falling when I walk by holding onto the wall. So I wonder if there's any simple way to practice safely at home."  H12: "Could a doctor teach me some exercises that I can do at home to stretch my waist and joints, the kind that won't be too tiring?" |
| 2.4 Medication safety and guidance requirements | H4: "The doctor prescribed over ten kinds of medicine. There are so many that I can't remember them all. I'm afraid I'll forget to take them."  H9: "I have to take several kinds of medicine every day, and the dosage of each medicine is different. When I get home, I'm afraid of missing or taking the wrong medicine." |
| 1. Theme Three: Demand for Continuous Services and Safeguards in Medical Institutions | 3.1 Medical accessibility needs | H2: "...... If something happens at home, just call and ask. It would be even better if you could leave your phone number......."  H3: "Sometimes my child drives me to the hospital for an injection. The traditional Chinese medicine hospital is quite far away, and each round trip takes a long time. So I try to go there as little as possible." |
| 3.2 Demand for follow-up visits and home services | H6: "Does the hospital or clinic deliver medicine to your door? Paying some money is not a big deal. The main thing is that we can't go out in winter and we don't want to trouble our daughter."  H8: "If someone could come to our home often to listen to our heartbeats and measure our blood pressure, we wouldn't have to travel long distances with our old arms and legs." |
| 3.3 The demand for improving the functions of primary medical institutions | H1: "In community hospitals, it's just injections and intravenous infusions. Serious illnesses can't be treated at all."  H4: "......If there were people practicing traditional Chinese medicine in the community hospital, we wouldn't have to go back and forth and run around." |
| 3.4 The demand for medical insurance protection | H2: "The reimbursement from medical insurance is not very generous either. Just this medicine costs a huge sum of money each time. Last time I was hospitalized for surgery, I stayed for many days and spent tens of thousands of yuan."  H4: "The family is borrowing money everywhere. The medical insurance doesn't cover much either. It's basically all out of pocket." The medicine is not reimbursed either. This expense is really huge." |
|
|
